# Supplementary material
Source: PubMed Central journal article supplement (PMC5338412)
Supplement: pnas.1620874114.sapp.pdf [file pnas.1620874114.sapp.pdf]

**a**

|            | Universal Site 1, 'Barcode Sequence', Random Sequence, Universal Site 2 |
|------------|-------------------------------------------------------------------------|
| Barcode 1  | A*G*A*CGTGTGCTCTTCCGATCT GAGGGTACTT NNNNNNNNNN AGATCGGAAGAGCGTCG*T*G*T  |
| Barcode 2  | A*G*A*CGTGTGCTCTTCCGATCT GACAATTGCC NNNNNNNNNN AGATCGGAAGAGCGTCG*T*G*T  |
| Barcode 3  | A*G*A*CGTGTGCTCTTCCGATCT TAACGCACCT NNNNNNNNNN AGATCGGAAGAGCGTCG*T*G*T  |
| Barcode 4  | A*G*A*CGTGTGCTCTTCCGATCT ATGATCGTCG NNNNNNNNNN AGATCGGAAGAGCGTCG*T*G*T  |
| Barcode 5  | A*G*A*CGTGTGCTCTTCCGATCT TGTCTCCCAT NNNNNNNNNN AGATCGGAAGAGCGTCG*T*G*T  |
| Barcode 6  | A*G*A*CGTGTGCTCTTCCGATCT GGAGAAACAG NNNNNNNNNN AGATCGGAAGAGCGTCG*T*G*T  |
| Barcode 7  | A*G*A*CGTGTGCTCTTCCGATCT CGTACAAACG NNNNNNNNNN AGATCGGAAGAGCGTCG*T*G*T  |
| Barcode 8  | A*G*A*CGTGTGCTCTTCCGATCT GATTTGTGGG NNNNNNNNNN AGATCGGAAGAGCGTCG*T*G*T  |
| Barcode 9  | A*G*A*CGTGTGCTCTTCCGATCT TTGCAGCCTT NNNNNNNNNN AGATCGGAAGAGCGTCG*T*G*T  |
| Barcode 10 | A*G*A*CGTGTGCTCTTCCGATCT GAATGCTGAC NNNNNNNNNN AGATCGGAAGAGCGTCG*T*G*T  |
| Barcode 11 | A*G*A*CGTGTGCTCTTCCGATCT ATCCATGAGG NNNNNNNNNN AGATCGGAAGAGCGTCG*T*G*T  |
| Barcode 12 | A*G*A*CGTGTGCTCTTCCGATCT TTCCACGATG NNNNNNNNNN AGATCGGAAGAGCGTCG*T*G*T  |
| Barcode 13 | A*G*A*CGTGTGCTCTTCCGATCT GCTGGGAATT NNNNNNNNNN AGATCGGAAGAGCGTCG*T*G*T  |
| Barcode 14 | A*G*A*CGTGTGCTCTTCCGATCT CAAAACGACG NNNNNNNNNN AGATCGGAAGAGCGTCG*T*G*T  |
| Barcode 15 | A*G*A*CGTGTGCTCTTCCGATCT TCTCGCCTTT NNNNNNNNNN AGATCGGAAGAGCGTCG*T*G*T  |
| Barcode 16 | A*G*A*CGTGTGCTCTTCCGATCT CAGATCAGAG NNNNNNNNNN AGATCGGAAGAGCGTCG*T*G*T  |
| Barcode 17 | A*G*A*CGTGTGCTCTTCCGATCT GACACGTTCT NNNNNNNNNN AGATCGGAAGAGCGTCG*T*G*T  |
| Barcode 18 | A*G*A*CGTGTGCTCTTCCGATCT GCTAAGGTCT NNNNNNNNNN AGATCGGAAGAGCGTCG*T*G*T  |
| Barcode 19 | A*G*A*CGTGTGCTCTTCCGATCT TGTTCGACCT NNNNNNNNNN AGATCGGAAGAGCGTCG*T*G*T  |
| Barcode 20 | A*G*A*CGTGTGCTCTTCCGATCT CCCAAAGACA NNNNNNNNNN AGATCGGAAGAGCGTCG*T*G*T  |
| Barcode 21 | A*G*A*CGTGTGCTCTTCCGATCT CAGGTAGGAA NNNNNNNNNN AGATCGGAAGAGCGTCG*T*G*T  |
| Barcode 22 | A*G*A*CGTGTGCTCTTCCGATCT CATTATCGCG NNNNNNNNNN AGATCGGAAGAGCGTCG*T*G*T  |
| Barcode 23 | A*G*A*CGTGTGCTCTTCCGATCT CAGAGACTGA NNNNNNNNNN AGATCGGAAGAGCGTCG*T*G*T  |
| Barcode 24 | A*G*A*CGTGTGCTCTTCCGATCT TGACATGCAC NNNNNNNNNN AGATCGGAAGAGCGTCG*T*G*T  |
| Barcode 25 | A*G*A*CGTGTGCTCTTCCGATCT TGTTGGTTCC NNNNNNNNNN AGATCGGAAGAGCGTCG*T*G*T  |
| Barcode 26 | A*G*A*CGTGTGCTCTTCCGATCT CTCTCTGAAC NNNNNNNNNN AGATCGGAAGAGCGTCG*T*G*T  |
| Barcode 27 | A*G*A*CGTGTGCTCTTCCGATCT CACTAGCCAA NNNNNNNNNN AGATCGGAAGAGCGTCG*T*G*T  |
| Barcode 28 | A*G*A*CGTGTGCTCTTCCGATCT TGACTTTGCC NNNNNNNNNN AGATCGGAAGAGCGTCG*T*G*T  |
| Barcode 29 | A*G*A*CGTGTGCTCTTCCGATCT TTCAGCGAAG NNNNNNNNNN AGATCGGAAGAGCGTCG*T*G*T  |
| Barcode 30 | A*G*A*CGTGTGCTCTTCCGATCT ACAGGCATAC NNNNNNNNNN AGATCGGAAGAGCGTCG*T*G*T  |

**b**

Binds to universal site 1

Binds to universal site 2

Index for Illumina Sequencing (i5 / i7)

|                                 |                                                                        |
|---------------------------------|------------------------------------------------------------------------|
| Universal Reverse Primer (i5)   | AATGATACGGCGACCACCGAGATCTACACAGGCTATAACACTCTTTCCCTACACGACGCTCTTCCGATCT |
| Index Base Forward Primer       | TGACTGGAGTTCAGACGTGTGCTCTTCCGATCT                                      |
| Index Final Forward Primer (i7) | CAAGCAGAAGACGGCATAACGAGATGGCAGATA GTGACTGGAGTTCAGACGTGTG               |

**Figure S1.** DNA barcodes and PCR-based barcode amplification. **(a)** Up to 30 different nanoparticles were analyzed in the same mouse using the following thirty sequences. The barcodes were subdivided into 'universal' sites, which were the same for all sequences, and unique barcodes, which varied with each sequence. The random sequence was inserted to monitor potentially excessive PCR amplification. **(b)** PCR primers used to amplify the DNA sequences. The three primers were added together in a PCR reaction. The Index base was added at 1/10th the concentration of the Universal Reverse and Index Final Forward Primers. The PCR conditions are outlined in detail in the Methods Section. The \* refers to a phosphorothioate-modified linkage, and N's represent random nucleotides.

a

| Figure 2b, Figure 2c. Dose is 0.04 mg/kg for each barcode. |         |             |             |           |                   |            |
|------------------------------------------------------------|---------|-------------|-------------|-----------|-------------------|------------|
| Name in Figure                                             | Lipid   | PEG         | Lipid Mol % | PEG Mol % | Cholesterol Mol % | DSPC Mol % |
| Liver LNP                                                  | C12-200 | C14 PEG2000 | 50          | 1.5       | 38.5              | 10         |
| Lung LNP1                                                  | 7C1     | C14 PEG2000 | 70          | 30        | 0                 | 0          |
| Lung LNP2                                                  | 7C1     | C14 PEG2000 | 80          | 0         | 20                | 0          |
| Lung LNP3                                                  | 7C1     | C14 PEG2000 | 70          | 20        | 10                | 0          |

| Figure 2d, Supplementary Figure 3a |         |             |             |           |                   |            |
|------------------------------------|---------|-------------|-------------|-----------|-------------------|------------|
| Name in Figure                     | Lipid   | PEG         | Lipid Mol % | PEG Mol % | Cholesterol Mol % | DSPC Mol % |
| All Data Points                    | C12-200 | C14 PEG2000 | 50          | 1.5       | 38.5              | 10         |

| Figure 2e, Supplementary Figure 3b. Dose is 0.04 mg/kg for each barcode. |         |             |             |           |                   |            |
|--------------------------------------------------------------------------|---------|-------------|-------------|-----------|-------------------|------------|
| Name in Figure                                                           | Lipid   | PEG         | Lipid Mol % | PEG Mol % | Cholesterol Mol % | DSPC Mol % |
| Liver NP1                                                                | C12-200 | C14 PEG2000 | 50          | 1.5       | 38.5              | 10         |
| Liver NP2                                                                | C12-200 | C14 PEG2000 | 50          | 1.5       | 38.5              | 10         |
| Liver NP3                                                                | C12-200 | C14 PEG2000 | 50          | 1.5       | 38.5              | 10         |
| Liver NP4                                                                | C12-200 | C14 PEG2000 | 50          | 1.5       | 38.5              | 10         |
| Liver NP5                                                                | C12-200 | C14 PEG2000 | 50          | 1.5       | 38.5              | 10         |

| Figure 2f. Dose is 0.04 mg/kg for each barcode. |       |             |             |           |                   |            |
|-------------------------------------------------|-------|-------------|-------------|-----------|-------------------|------------|
|                                                 | Lipid | PEG         | Lipid Mol % | PEG Mol % | Cholesterol Mol % | DSPC Mol % |
|                                                 | 7C1   | C14 PEG2000 | 50          | 0         | 50                | 0          |
|                                                 | 7C1   | C14 PEG2000 | 50          | 25        | 25                | 0          |
|                                                 | 7C1   | C14 PEG2000 | 65          | 15        | 20                | 0          |
|                                                 | 7C1   | C14 PEG2000 | 65          | 35        | 0                 | 0          |
|                                                 | 7C1   | C14 PEG2000 | 70          | 30        | 0                 | 0          |
|                                                 | 7C1   | C14 PEG2000 | 70          | 20        | 10                | 0          |
|                                                 | 7C1   | C14 PEG2000 | 75          | 25        | 0                 | 0          |
|                                                 | 7C1   | C14 PEG2000 | 80          | 20        | 0                 | 0          |
|                                                 | 7C1   | C14 PEG2000 | 80          | 15        | 5                 | 0          |
|                                                 | 7C1   | C14 PEG2000 | 90          | 10        | 0                 | 0          |

| Figure 3, Supplementary Figure 4, Supplementary Figure 5. Dose is 0.04 mg/kg for each barcode. |         |          |             |          |             |           |            |          |
|------------------------------------------------------------------------------------------------|---------|----------|-------------|----------|-------------|-----------|------------|----------|
| Barcode                                                                                        | Lipid   | PEG Tail | PEG MW (Da) | PEG Mol% | Lipid Mol % | DSPC mol% | Chol. mol% | PEG mol% |
| 1                                                                                              | C12-200 | 14       | 3000        | 2.25     | 50          | 10        | 37.75      | 2.25     |
| 2                                                                                              | C12-200 | 14       | 3000        | 1.50     | 50          | 10        | 38.50      | 1.50     |
| 3                                                                                              | C12-200 | 18       | 1000        | 0.75     | 50          | 10        | 39.25      | 0.75     |
| 4                                                                                              | C12-200 | 18       | 3000        | 0.75     | 50          | 10        | 39.25      | 0.75     |
| 5                                                                                              | C12-200 | 16       | 1000        | 3.00     | 50          | 10        | 37.00      | 3.00     |
| 6                                                                                              | C12-200 | 16       | 2000        | 1.50     | 50          | 10        | 38.50      | 1.50     |
| 7                                                                                              | C12-200 | 16       | 2000        | 0.75     | 50          | 10        | 39.25      | 0.75     |
| 8                                                                                              | C12-200 | 16       | 2000        | 3.75     | 50          | 10        | 36.25      | 3.75     |
| 9                                                                                              | C12-200 | 18       | 1000        | 3.00     | 50          | 10        | 37.00      | 3.00     |
| 10                                                                                             | C12-200 | 16       | 1000        | 2.25     | 50          | 10        | 37.75      | 2.25     |
| 11                                                                                             | C12-200 | 18       | 2000        | 3.75     | 50          | 10        | 36.25      | 3.75     |
| 12                                                                                             | C12-200 | 14       | 1000        | 4.50     | 50          | 10        | 35.50      | 4.50     |
| 13                                                                                             | C12-200 | 14       | 2000        | 0.75     | 50          | 10        | 39.25      | 0.75     |
| 14                                                                                             | C12-200 | 14       | 2000        | 4.50     | 50          | 10        | 35.50      | 4.50     |
| 15                                                                                             | C12-200 | 14       | 2000        | 3.00     | 50          | 10        | 37.00      | 3.00     |
| 16                                                                                             | C12-200 | 18       | 3000        | 4.50     | 50          | 10        | 35.50      | 4.50     |
| 17                                                                                             | C12-200 | 14       | 3000        | 3.00     | 50          | 10        | 37.00      | 3.00     |
| 18                                                                                             | C12-200 | 18       | 2000        | 2.25     | 50          | 10        | 37.75      | 2.25     |
| 19                                                                                             | C12-200 | 16       | 3000        | 3.00     | 50          | 10        | 37.00      | 3.00     |
| 20                                                                                             | C12-200 | 18       | 3000        | 3.75     | 50          | 10        | 36.25      | 3.75     |
| 21                                                                                             | C12-200 | 14       | 1000        | 1.50     | 50          | 10        | 38.50      | 1.50     |
| 22                                                                                             | C12-200 | 14       | 1000        | 3.75     | 50          | 10        | 36.25      | 3.75     |
| 23                                                                                             | C12-200 | 18       | 2000        | 4.50     | 50          | 10        | 35.50      | 4.50     |
| 24                                                                                             | C12-200 | 18       | 3000        | 2.25     | 50          | 10        | 37.75      | 2.25     |
| 25                                                                                             | C12-200 | 18       | 1000        | 1.50     | 50          | 10        | 38.50      | 1.50     |
| 26                                                                                             | C12-200 | 16       | 3000        | 0.75     | 50          | 10        | 39.25      | 0.75     |
| 27                                                                                             | C12-200 | 16       | 1000        | 4.50     | 50          | 10        | 35.50      | 4.50     |
| 28                                                                                             | C12-200 | 14       | 1000        | 3.75     | 50          | 10        | 36.25      | 3.75     |
| 29                                                                                             | C12-200 | 16       | 2000        | 2.25     | 50          | 10        | 37.75      | 2.25     |
| 30                                                                                             | C12-200 | 16       | 3000        | 1.50     | 50          | 10        | 38.50      | 1.50     |

**Figure S2.** Formulation details for all nanoparticles described in this publication. Nanoparticle formulations 2, 3, 7, 9, 13, 19, 20, 21, 25, and 27 were used in the Factor 7 siRNA experiment in Figure 4b.

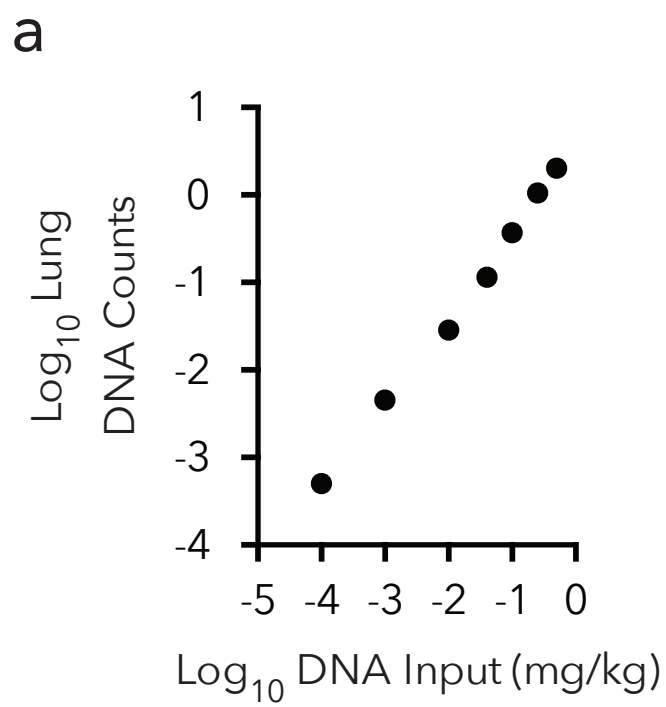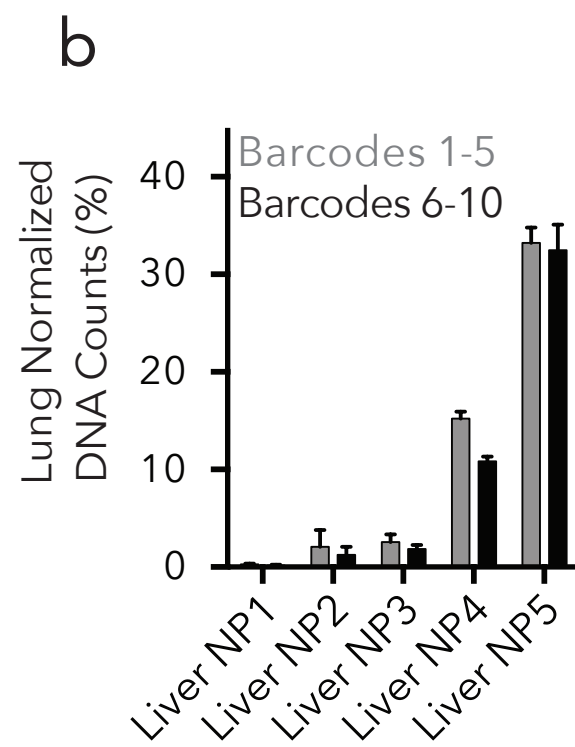

**Figure S3.** DNA barcoded nanoparticle biodistribution provides a linear output. **(a)** DNA barcode counts in the liver 4 hours after the administration of an ‘in vivo standard curve’. The same C12-200 nanoparticle formulation was made 7 separate times, with 7 different barcodes. These solutions were mixed together at different doses (inputs) to form an ‘in vivo standard curve’. DNA readouts align with this DNA input at doses between 0.0001 and 0.5 mg/kg DNA barcode. N = 5 mice / group. **(b)** Normalized DNA barcode counts in lung 4 hours after administration of different DNA sequences. 5 different C12-200 NPs were formulated twice, each with a different barcode. N = 5 mice / group. In all cases, the detailed NP formulation data are listed in Supplementary Table 2. In all cases, the data are plotted as average + / - standard deviation.

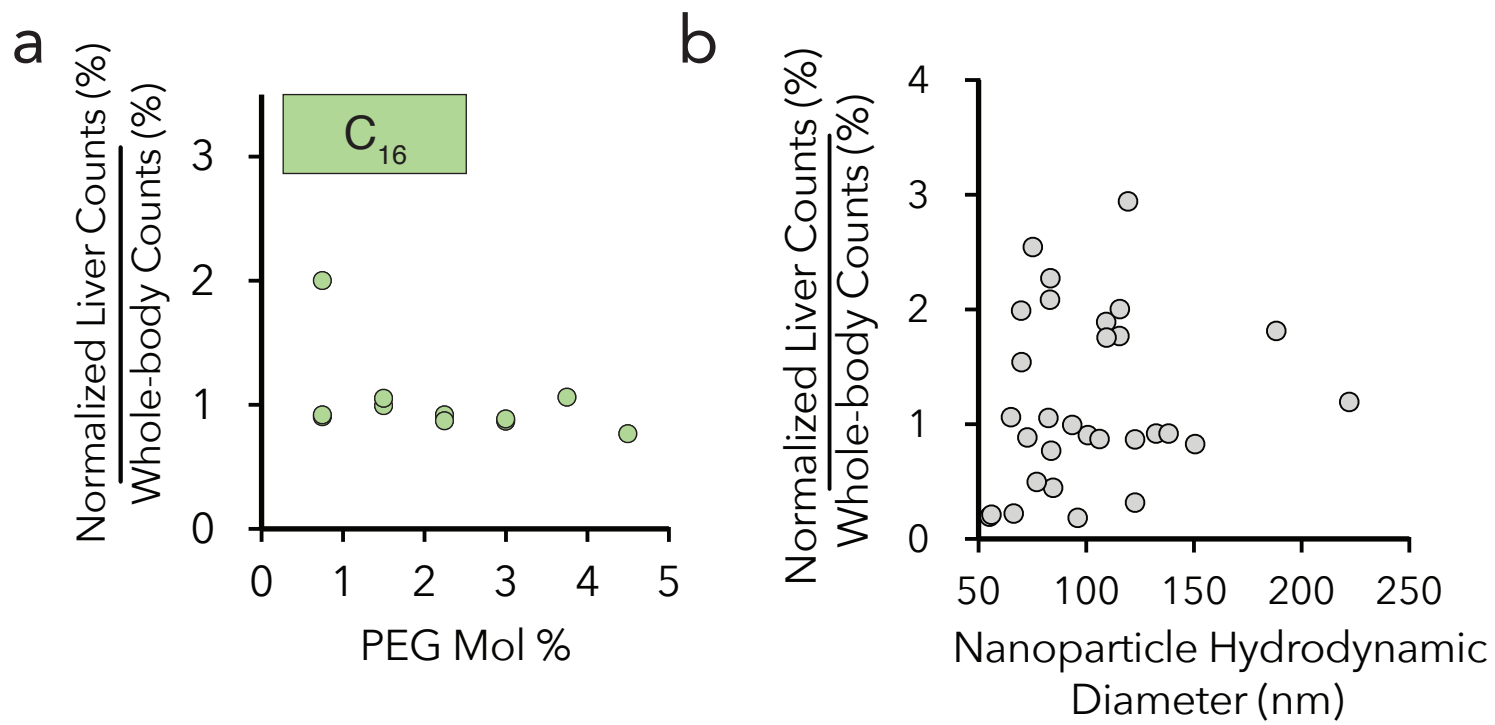

**Figure S4.** (a) Normalized liver counts, divided by the normalized counts for the rest of the tested tissues, as a function of PEG mole percentage. This measure quantifies how delivery to the liver, compared to the rest of the body, changes. (b) Normalized liver counts, divided by the normalized counts for the rest of the tested tissues, as a function of nanoparticle diameter.

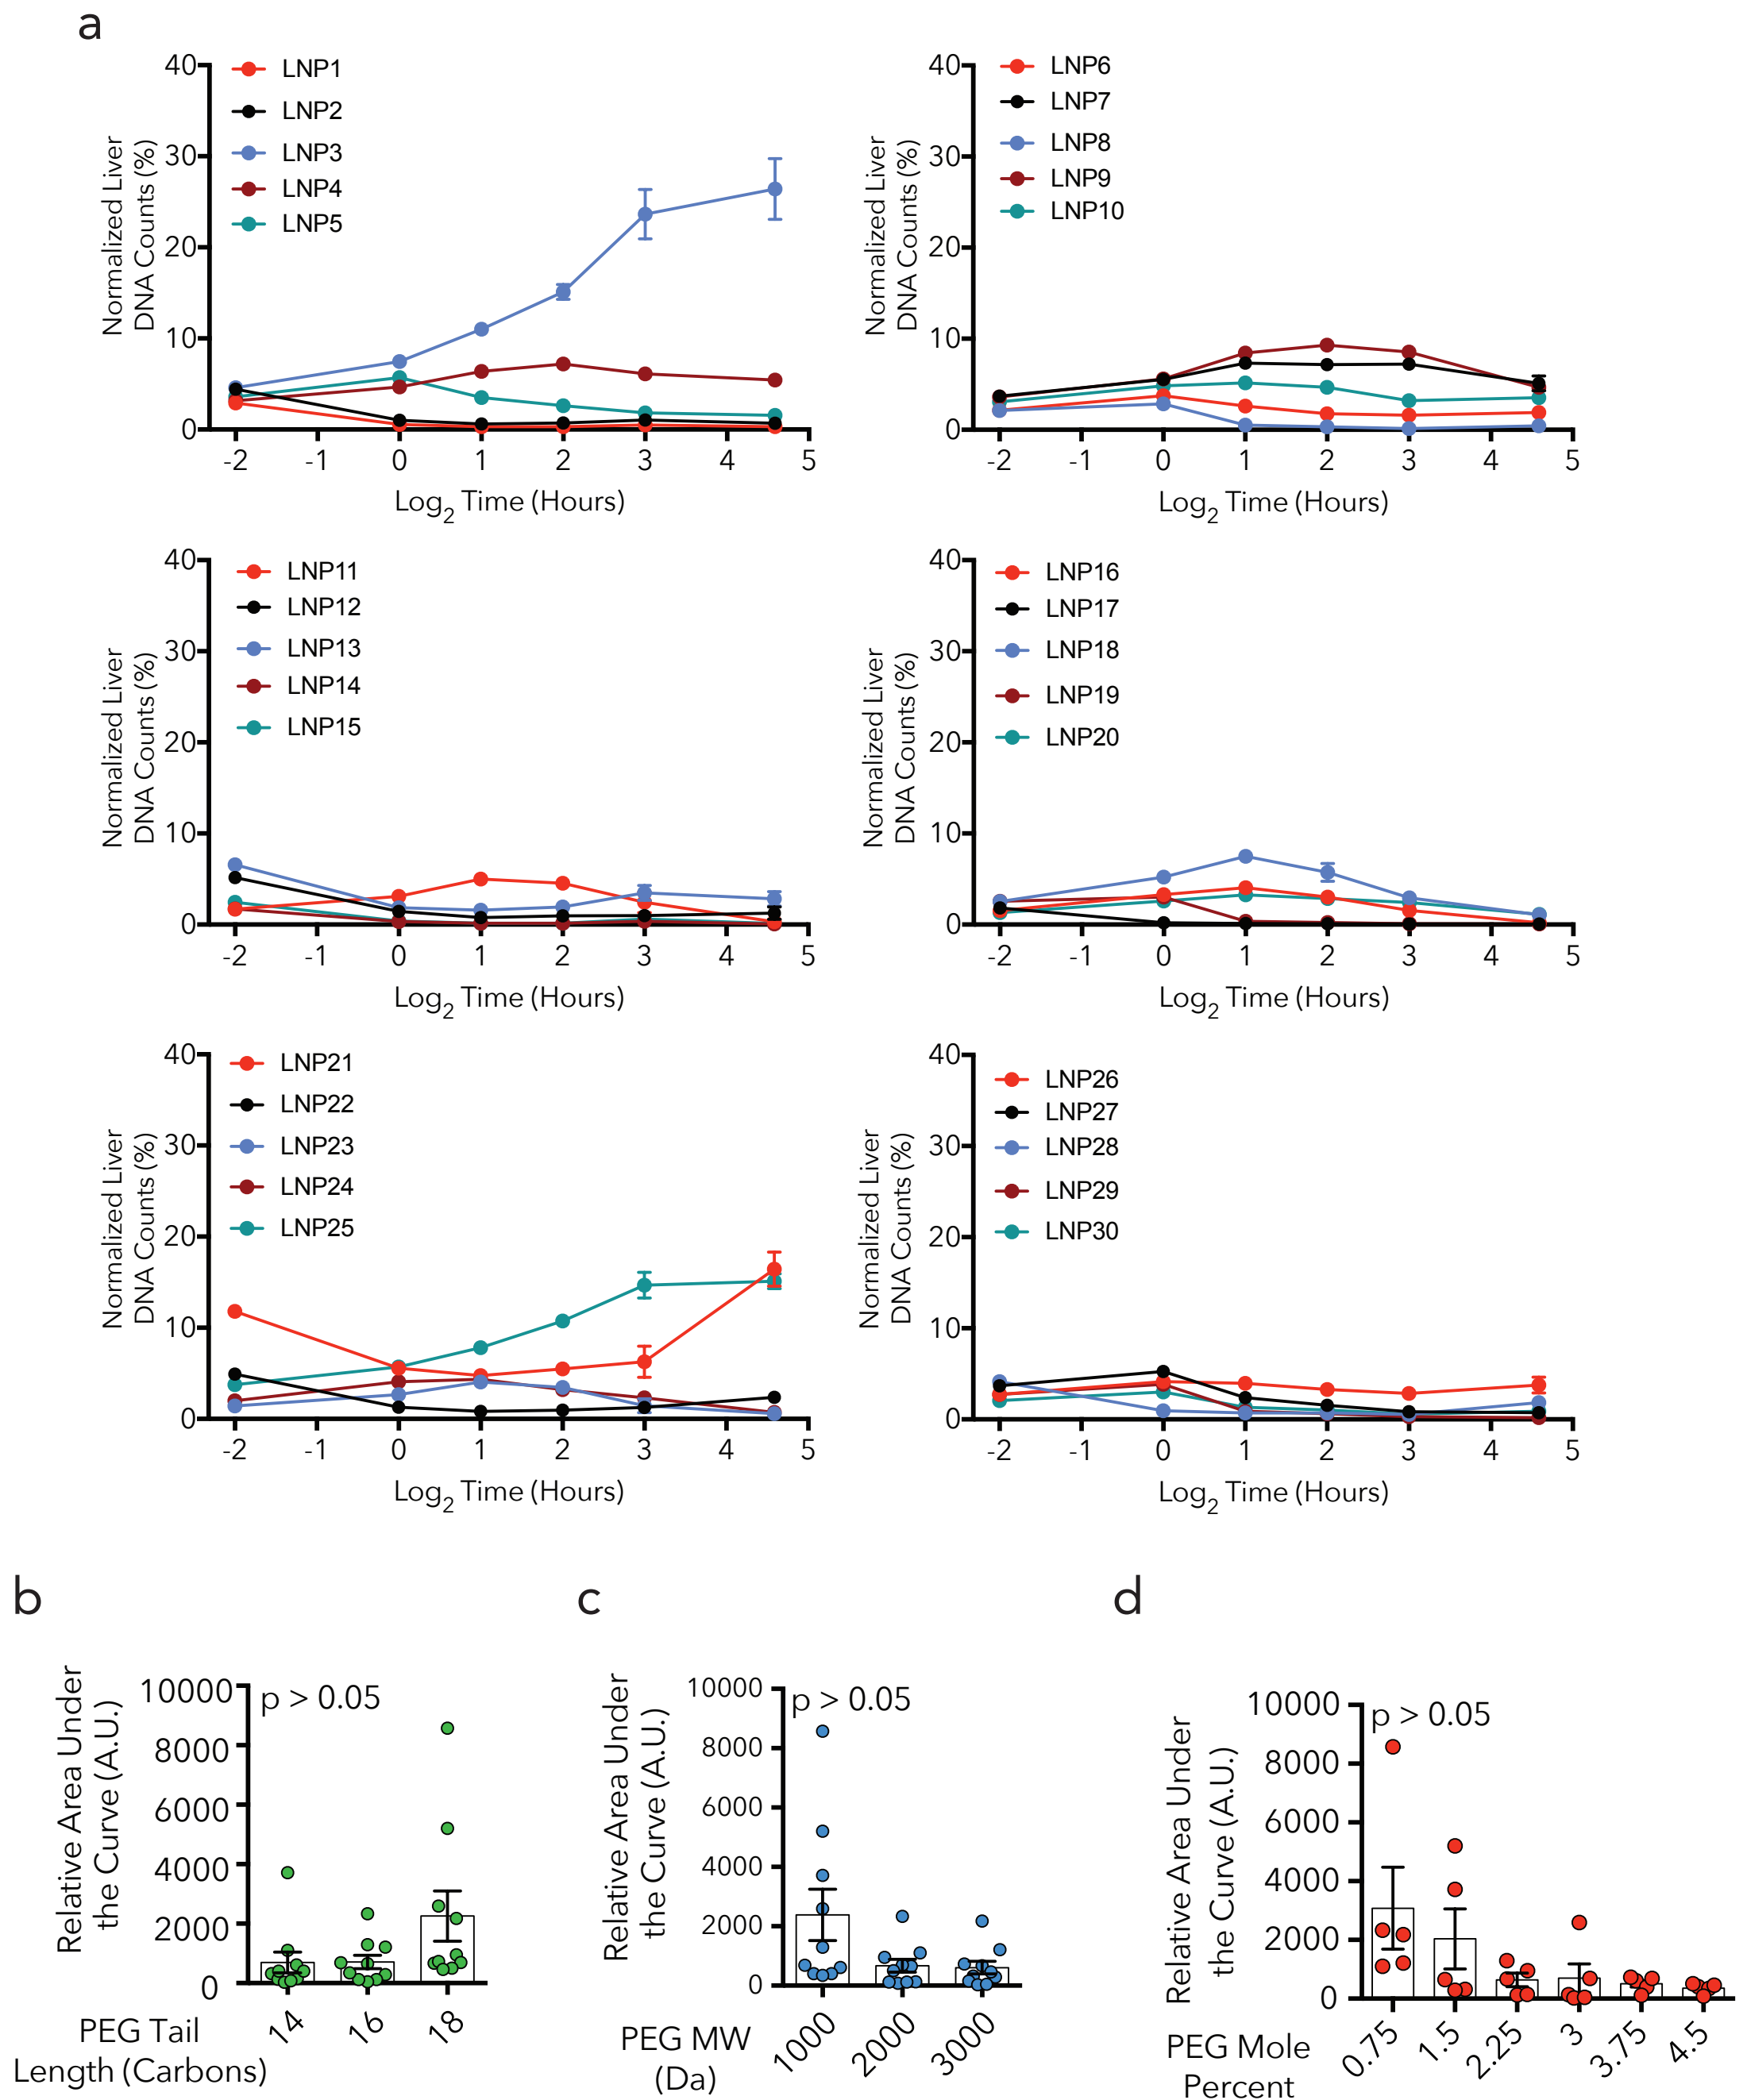

**Figure S5.** DNA barcoded nanoparticles facilitate high throughput in vivo analysis. **(a)** Normalized liver DNA counts for thirty nanoparticles between 0.25 and 24 hours after injection. **(b-d)** Area under the curve for 30 nanoparticles in the liver, as a function of PEG lipid length, PEG molecular weight, or mole % PEG, respectively.

## Figure S6. Area Under Curve (AUC) Calculations

AUC calculations reflect a concentration in the liver, not just a normalized delivery percentage. To translate normalized liver counts for each LNP to AUC, we used a pharmacokinetic model calculated using liver-targeting LNPs with activity replicates C12-200. In this model, LNPs were formulated with siRNA-containing lipid nanoparticles  $^{14}\text{C}$ -labelled ionizable lipids, 10% DSPC, 38.5% cholesterol, and 1.5 mol%  $\text{C}_{16}\text{PEG}_{2000}$ . Following intravenous injection, the liver accumulation of  $^{14}\text{C}$  was monitored over time. We created an LNP (#6) with identical ionizable lipid, DSPC, cholesterol, and  $\text{C}_{16}\text{PEG}_{2000}$ . By using an identical lipid composition between as described previously using radiolabeling, we reasoned that AUC could be calculated.

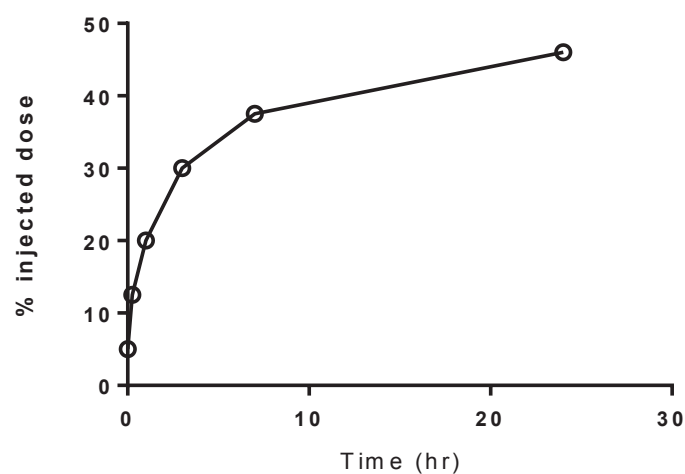

**Supplementary Fig. 6a.** Radiolabeled LNP in the liver post intravenous injection for a LNP with 1.5 mol% C16 PEG 2000, as reported by Mui et al.

At each timepoint, the biodistribution of each of the thirty LNPs was normalized with respect to LNP #6. For example, the average barcoding biodistribution readout for representative LNPs #6, #23, and #26 were:

**Supplementary Fig. 6b:** Biodistribution of barcodes for selected LNPs in the liver

|                   | 0.25 hr | 1 hr  | 2 hr  | 4 hr  | 8 hr  | 24 hr |
|-------------------|---------|-------|-------|-------|-------|-------|
| LNP #6            | 2.98%   | 5.23% | 3.62% | 2.51% | 2.34% | 2.87% |
| LNP #23           | 1.47%   | 2.81% | 4.20% | 3.67% | 1.60% | 0.66% |
| LNP #26           | 2.44%   | 3.72% | 3.52% | 2.98% | 2.68% | 3.66% |
| Sum of LNPs #1-30 | 100%    | 100%  | 100%  | 100%  | 100%  | 100%  |

Normalized to LNP #6, these values become:

**Supplementary Fig. 6c:** Normalized biodistribution of LNP barcodes in the liver with respect to LNP6

|                   | 0.25 hr | 1 hr  | 2 hr  | 4 hr  | 8 hr  | 24 hr |
|-------------------|---------|-------|-------|-------|-------|-------|
| LNP #6            | 1.00    | 1.00  | 1.00  | 1.00  | 1.00  | 1.00  |
| LNP #23           | 0.49    | 0.54  | 1.16  | 1.46  | 0.68  | 0.23  |
| LNP #26           | 0.82    | 0.71  | 0.97  | 1.18  | 1.15  | 1.28  |
| Sum of LNPs #1-30 | 30.00   | 30.00 | 30.00 | 30.00 | 30.00 | 30.00 |

Then, LNP #6 is fit to the curve shown in Supplementary Fig. 6a. At each timepoint, there is a “scaling factor” which is multiplied by the value for LNP in #6 to fit the curve shown in Figure 1. These scaling factors are shown below.

**Supplementary Fig. 6d:** Scaling factor to fit LNP #6 to the curve shown in Figure 1.

|                | 0.25 hr | 1 hr | 2 hr | 4 hr | 8 hr | 24 hr |
|----------------|---------|------|------|------|------|-------|
| Scaling factor | 5.0     | 12.5 | 20.0 | 30.0 | 37.5 | 46.0  |

Each value in Table 2 is then multiplied by the scaling factor at each timepoint to find the relative concentration of each LNP #1-30 in the liver, as shown below.

**Supplementary Fig. 6e:** Normalized amount of selected LNP barcodes in the liver

|         | 0.25 hr | 1 hr | 2 hr | 4 hr | 8 hr | 24 hr |
|---------|---------|------|------|------|------|-------|
| LNP #6  | 5.0     | 12.5 | 20.0 | 30.0 | 37.5 | 46.0  |
| LNP #23 | 2.5     | 6.7  | 23.2 | 43.8 | 25.6 | 10.6  |
| LNP #26 | 4.1     | 8.9  | 19.4 | 35.6 | 42.9 | 58.7  |

These example curves are shown plotted in Figure 2 below.

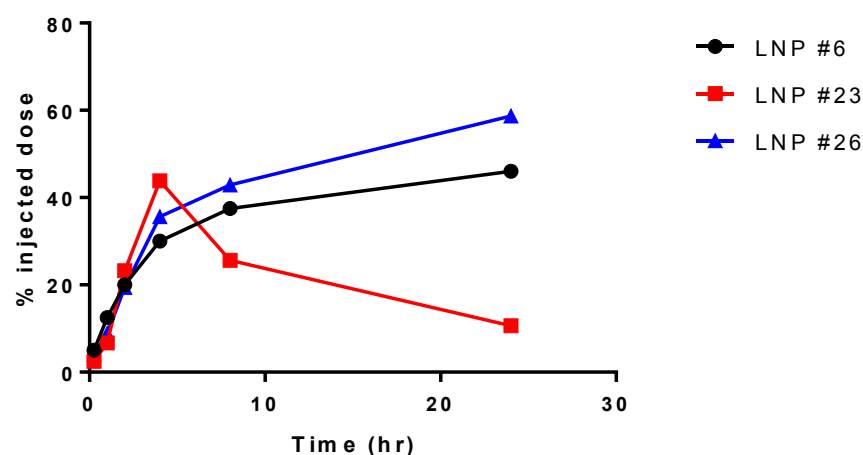

**Supplementary Fig. 6f:** % of Injected dose, for different LNPs in the liver 0.25, 1, 2, 4, 8, or 24 hours after injection.

Using Supplementary Fig. 6f, the area under the curve (units of concentration \* time) were calculated by integrating under the curve, using a trapezoidal rule in Prism (GraphPad). Finally, each AUC was normalized with respect to the input barcode read to account for slight variations in barcode concentration or amplification. This results in the final relative AUC for each LNP.

| Data related to Figure 2b-c. |         |              |               |              |
|------------------------------|---------|--------------|---------------|--------------|
| Particle                     | C12-200 | 7C1, 70.0.30 | 7C1, 70.10.20 | 7C1, 80.0.20 |
| Barcode                      | Nano_3  | Nano_4       | Nano_7        | Nano_8       |
| Control                      | 294     | 335          | 236           | 358          |
| FreshLung1                   | 408     | 2012         | 3006          | 3802         |
| FreshLung2                   | 487     | 1953         | 3296          | 4181         |
| FreshLung3                   | 141     | 551          | 871           | 1199         |
| FreshLung4                   | 258     | 1457         | 2244          | 3040         |
| FreshLiver1                  | 4093    | 2789         | 3617          | 4229         |
| FreshLiver2                  | 3436    | 2983         | 4270          | 4588         |
| FreshLiver3                  | 2795    | 2377         | 2923          | 3170         |
| FreshLiver4                  | 2579    | 2300         | 3130          | 3266         |
| 24hLung1                     | 371     | 1767         | 2511          | 3490         |
| 24hLung2                     | 488     | 2004         | 2805          | 4238         |
| 24hLung3                     | 196     | 963          | 1595          | 2207         |
| 24hLung4                     | 63      | 411          | 547           | 769          |
| 24hLiver1                    | 3338    | 2881         | 3521          | 4024         |
| 24hLiver2                    | 1708    | 1500         | 2111          | 2228         |
| 24hLiver3                    | 2196    | 2074         | 2600          | 3203         |
| 24hLiver4                    | 2429    | 2459         | 3211          | 3641         |

Figure S7. Raw DNA counts for experiments depicted in Figures 2-4. X.Y.Z (for example, 70.0.30) refers to the molar percentage of the lipid, cholesterol, and PEG, respectively.



**Data related to Figure 2d.**

| Dose administered (mg/kg) | 1       | 0.75    | 0.5     | 0.25    | 0.1     | 0.04    | 0.01    | 0.001   | 0.0001  |
|---------------------------|---------|---------|---------|---------|---------|---------|---------|---------|---------|
| Barcode                   | Nano_14 | Nano_15 | Nano_16 | Nano_17 | Nano_18 | Nano_19 | Nano_20 | Nano_21 | Nano_22 |
| Lung6                     | 274878  | 113047  | 126206  | 67253   | 22740   | 6685    | 1686    | 270     | 53      |
| Lung7                     | 234548  | 118401  | 106853  | 55228   | 19716   | 6493    | 1642    | 213     | 16      |
| Lung8                     | 226216  | 88798   | 101339  | 52858   | 18040   | 5583    | 1306    | 222     | 25      |
| Lung9                     | 274368  | 119608  | 126030  | 65172   | 23725   | 6856    | 1836    | 343     | 28      |
| Lung10                    | 232533  | 108925  | 108212  | 54395   | 19707   | 6417    | 1552    | 223     | 21      |
| Liver6                    | 237274  | 102206  | 106710  | 48610   | 22667   | 8340    | 1819    | 217     | 20      |
| Liver7                    | 219183  | 95648   | 92747   | 45721   | 20010   | 7905    | 1699    | 181     | 25      |
| Liver8                    | 234203  | 102772  | 104033  | 49756   | 21960   | 8739    | 1786    | 183     | 23      |
| Liver9                    | 229421  | 102644  | 103553  | 50755   | 21291   | 7762    | 1689    | 212     | 18      |
| Liver10                   | 172843  | 80544   | 72559   | 36010   | 15076   | 5858    | 1168    | 152     | 17      |
| LinCtl                    | 152787  | 146089  | 64092   | 33381   | 12219   | 6053    | 1214    | 113     | 17      |

Data related to Figure 2e.

| Particle | Particle 1 | Particle 2 | Particle 3 | Particle 4 | Particle 5 | Particle 1 | Particle 2 | Particle 3 | Particle 4 | Particle 5 |
|----------|------------|------------|------------|------------|------------|------------|------------|------------|------------|------------|
| Barcode  | Nano_14    | Nano_15    | Nano_16    | Nano_17    | Nano_18    | Nano_19    | Nano_20    | Nano_21    | Nano_22    | Nano_23    |
| Lung1    | 30753      | 15303      | 23695      | 14884      | 213080     | 191387     | 99076      | 72999      | 1672       | 1134       |
| Lung2    | 18875      | 11701      | 21041      | 14970      | 204392     | 200286     | 99185      | 71638      | 1444       | 988        |
| Lung3    | 4004       | 3067       | 9681       | 7825       | 183048     | 183504     | 73728      | 51909      | 1177       | 771        |
| Lung4    | 9711       | 7296       | 12645      | 9768       | 191550     | 191457     | 94225      | 66402      | 2363       | 1654       |
| Lung5    | 2323       | 1802       | 9644       | 7596       | 170664     | 170854     | 77273      | 53232      | 1064       | 889        |
| Liver1   | 19060      | 10972      | 19582      | 15975      | 126777     | 116058     | 82390      | 73773      | 4902       | 4747       |
| Liver2   | 21431      | 11673      | 21939      | 18587      | 108918     | 94561      | 68035      | 70293      | 6898       | 6544       |
| Liver3   | 20496      | 12028      | 24982      | 21389      | 157330     | 142562     | 97370      | 91633      | 6882       | 7679       |
| Liver4   | 31837      | 17034      | 29718      | 25299      | 176659     | 165811     | 112208     | 110146     | 9254       | 9597       |
| Liver5   | 17738      | 10261      | 20443      | 17962      | 143834     | 133238     | 82252      | 78753      | 5581       | 6681       |
| SwapCtl  | 16484      | 19834      | 21549      | 20238      | 19068      | 21518      | 21581      | 19229      | 21339      | 16144      |

| Data related to Figure 2f. |              |               |               |              |              |               |              |              |              |              |
|----------------------------|--------------|---------------|---------------|--------------|--------------|---------------|--------------|--------------|--------------|--------------|
| Particle                   | 7C1, 50:0:50 | 7C1, 50:25:25 | 7C1, 65:20:15 | 7C1, 65:0:35 | 7C1, 70:0:30 | 7C1, 70:10:20 | 7C1, 75:0:25 | 7C1, 80:0:20 | 7C1, 80:5:15 | 7C1, 90:0:10 |
| Barcode                    | Nano_1       | Nano_2        | Nano_3        | Nano_4       | Nano_5       | Nano_6        | Nano_7       | Nano_8       | Nano_9       | Nano_10      |
| Cell1                      | 5734         | 1847          | 2361          | 2415         | 2953         | 5144          | 2387         | 2971         | 722          | 2989         |
| Cell2                      | 7363         | 2928          | 2873          | 3375         | 3878         | 7754          | 3382         | 3839         | 1124         | 4213         |
| Cell3                      | 3849         | 1049          | 1462          | 1646         | 1853         | 3717          | 1777         | 1955         | 453          | 2113         |
| Cell4                      | 3556         | 1084          | 1323          | 1493         | 1798         | 3526          | 1661         | 1970         | 470          | 1935         |
| Tissue1                    | 2981         | 902           | 1206          | 1551         | 1698         | 2909          | 1363         | 1910         | 467          | 1712         |
| Tissue2                    | 15142        | 4797          | 6201          | 7813         | 7487         | 15813         | 7492         | 9046         | 2122         | 8529         |
| Tissue3                    | 4292         | 1396          | 1747          | 1915         | 2387         | 4218          | 2077         | 2516         | 632          | 2387         |
| Tissue4                    | 2173         | 693           | 918           | 947          | 1197         | 1974          | 957          | 1238         | 319          | 1204         |

Data related to Figure 3b-c.

|            | 14     | 14      | 18      | 18      | 16      | 16      | 16      | 16      | 18      | 16      | 18      | 14      | 14      | 14      | 14      |         |
|------------|--------|---------|---------|---------|---------|---------|---------|---------|---------|---------|---------|---------|---------|---------|---------|---------|
| PEG Tail   |        |         |         |         |         |         |         |         |         |         |         |         |         |         |         |         |
| PEG MW     | 3000   | 3000    | 1000    | 3000    | 1000    | 2000    | 2000    | 2000    | 1000    | 1000    | 2000    | 1000    | 2000    | 2000    | 2000    | 2000    |
| PEG Mol Wt | 2.25   | 1.5     | 0.75    | 0.75    | 3       | 1.5     | 0.75    | 3.75    | 3       | 2.25    | 3.75    | 4.5     | 0.75    | 4.5     | 3       | 3       |
| Barcode    | Nano_9 | Nano_10 | Nano_11 | Nano_12 | Nano_13 | Nano_14 | Nano_15 | Nano_16 | Nano_17 | Nano_18 | Nano_19 | Nano_20 | Nano_21 | Nano_22 | Nano_23 | Nano_23 |
| Lung1      | 12456  | 21646   | 46828   | 11383   | 9323    | 3384    | 18407   | 2674    | 12830   | 16156   | 8851    | 11474   | 61221   | 2955    | 6573    | 100     |
| Lung2      | 11229  | 20010   | 58214   | 14510   | 13211   | 4166    | 23832   | 2844    | 20098   | 22789   | 13108   | 13706   | 69602   | 2565    | 5481    | 100     |
| Lung3      | 8083   | 13269   | 31535   | 8095    | 10244   | 3063    | 13923   | 2687    | 9874    | 15237   | 10477   | 8327    | 39495   | 2056    | 4190    | 100     |
| Liver1     | 9924   | 16009   | 31928   | 7084    | 8867    | 2885    | 12115   | 2554    | 5990    | 14389   | 2934    | 8998    | 42415   | 2508    | 5469    | 100     |
| Liver2     | 8825   | 15068   | 31565   | 6965    | 9311    | 2781    | 11579   | 2800    | 5110    | 14341   | 2703    | 9901    | 47546   | 2270    | 4932    | 100     |
| Liver3     | 11316  | 18292   | 28022   | 7042    | 8528    | 2980    | 10519   | 3832    | 4346    | 13088   | 3322    | 9006    | 50097   | 2912    | 6836    | 100     |
| Liver4     | 10237  | 17406   | 29114   | 7449    | 8144    | 2916    | 11100   | 3485    | 4257    | 13342   | 2821    | 9715    | 63165   | 2100    | 5093    | 100     |
| Pancreas1  | 3146   | 4608    | 42706   | 8216    | 17418   | 3760    | 18684   | 4941    | 18184   | 23943   | 12493   | 7397    | 14047   | 1071    | 1918    | 100     |
| Pancreas2  | 2520   | 3714    | 40030   | 9108    | 17882   | 4053    | 20858   | 6212    | 17386   | 26148   | 10930   | 6891    | 12016   | 916     | 1724    | 100     |
| Pancreas3  | 3288   | 3982    | 52479   | 8801    | 21201   | 4806    | 18136   | 8146    | 17605   | 27746   | 14189   | 7300    | 9945    | 1354    | 2583    | 100     |
| Pancreas4  | 3838   | 6041    | 41882   | 7009    | 17067   | 3607    | 17133   | 5642    | 12851   | 23192   | 9990    | 10382   | 20207   | 1294    | 2420    | 100     |
| Kidney1    | 2671   | 3940    | 31024   | 14197   | 13920   | 3904    | 22395   | 1780    | 38563   | 22348   | 27171   | 3712    | 10522   | 798     | 1628    | 100     |
| Kidney2    | 2761   | 4363    | 32846   | 12562   | 13061   | 3415    | 18896   | 2169    | 30901   | 20954   | 20698   | 4622    | 13636   | 1103    | 1848    | 100     |
| Kidney3    | 2383   | 3621    | 21304   | 8328    | 11744   | 3176    | 13338   | 2388    | 19633   | 17103   | 19270   | 3082    | 9493    | 860     | 1666    | 100     |
| Muscle1    | 1552   | 1957    | 26541   | 5721    | 9390    | 2686    | 10854   | 2895    | 14193   | 13840   | 14409   | 2720    | 4148    | 680     | 1100    | 100     |
| Muscle4    | 1831   | 2264    | 35486   | 6395    | 14465   | 3309    | 14788   | 4508    | 12452   | 19873   | 15551   | 3896    | 5817    | 785     | 1241    | 100     |
| Muscle3    | 2068   | 2862    | 19565   | 6024    | 9011    | 2915    | 10256   | 3992    | 13610   | 12598   | 23018   | 2768    | 5672    | 1163    | 1309    | 100     |
| Uterus2    | 4866   | 5559    | 24746   | 8260    | 9645    | 2642    | 13133   | 3840    | 19591   | 14319   | 18605   | 5624    | 11978   | 2188    | 3996    | 100     |
| Uterus1    | 2973   | 4425    | 33658   | 12388   | 11166   | 3488    | 18484   | 3483    | 31198   | 18899   | 28930   | 4056    | 12234   | 966     | 1713    | 100     |
| Uterus3    | 1308   | 2152    | 25945   | 7698    | 13977   | 2728    | 11415   | 2597    | 20940   | 18842   | 21803   | 2547    | 6134    | 557     | 999     | 100     |
| Uterus4    | 1902   | 3165    | 25981   | 9254    | 11545   | 2751    | 13819   | 1762    | 24529   | 17678   | 22098   | 3657    | 9352    | 1235    | 1383    | 100     |
| Brain1     | 1892   | 3442    | 33313   | 15597   | 9235    | 3010    | 20220   | 889     | 55636   | 17285   | 36399   | 2418    | 8708    | 544     | 1066    | 100     |
| Brain2     | 1181   | 2148    | 33710   | 13577   | 10071   | 2580    | 15964   | 912     | 40996   | 16528   | 26128   | 2160    | 6680    | 419     | 897     | 100     |
| Brain3     | 2264   | 3270    | 29146   | 12436   | 13662   | 3684    | 17982   | 2170    | 32017   | 21303   | 33090   | 2498    | 7656    | 772     | 1377    | 100     |
| Brain4     | 2311   | 3915    | 37587   | 11873   | 10228   | 2919    | 17503   | 1780    | 34747   | 18832   | 25960   | 3858    | 11253   | 788     | 1415    | 100     |
| Heart1     | 1928   | 2862    | 21409   | 14004   | 12858   | 3114    | 17529   | 1938    | 34958   | 20161   | 25371   | 3456    | 6148    | 1028    | 1495    | 100     |
| Heart2     | 1675   | 2664    | 25170   | 18366   | 18202   | 3701    | 16652   | 2284    | 30636   | 26054   | 24145   | 3688    | 7078    | 937     | 1607    | 100     |
| Heart3     | 1592   | 2016    | 18015   | 11675   | 23799   | 4450    | 18192   | 2441    | 17812   | 28955   | 20886   | 2676    | 4401    | 836     | 1248    | 100     |
| Heart4     | 2504   | 3809    | 30891   | 13924   | 16554   | 3454    | 17966   | 2576    | 29340   | 24636   | 24025   | 5859    | 9574    | 1552    | 2472    | 100     |

|         |         |         |         |         |         |         |         |         |         |         |         |         |         |         |
|---------|---------|---------|---------|---------|---------|---------|---------|---------|---------|---------|---------|---------|---------|---------|
| 18      | 14      | 18      | 16      | 18      | 14      | 14      | 18      | 18      | 18      | 16      | 16      | 14      | 16      | 16      |
| 3000    | 3000    | 2000    | 3000    | 3000    | 1000    | 1000    | 2000    | 3000    | 1000    | 3000    | 1000    | 1000    | 2000    | 3000    |
| 4.5     | 3       | 2.25    | 3       | 3.75    | 1.5     | 3.75    | 4.5     | 2.25    | 1.5     | 0.75    | 4.5     | 3.75    | 2.25    | 1.5     |
| Nano_24 | Nano_25 | Nano_26 | Nano_27 | Nano_28 | Nano_29 | Nano_30 | Nano_31 | Nano_32 | Nano_33 | Nano_34 | Nano_35 | Nano_36 | Nano_37 | Nano_38 |
| 10024   | 5430    | 7996    | 2052    | 7107    | 28273   | 15532   | 7966    | 5724    | 37041   | 28855   | 5927    | 18301   | 6210    | 5192    |
| 15455   | 5143    | 10076   | 2490    | 10241   | 34419   | 17572   | 11778   | 7195    | 49188   | 32001   | 7994    | 20163   | 8225    | 5667    |
| 11636   | 3451    | 6637    | 2122    | 9482    | 20728   | 10690   | 11941   | 5395    | 26444   | 20917   | 9256    | 13281   | 6241    | 4037    |
| 3049    | 4317    | 3665    | 1952    | 2392    | 17192   | 12249   | 2516    | 3037    | 27789   | 22858   | 8040    | 14479   | 5492    | 3595    |
| 2688    | 4182    | 3556    | 2128    | 2126    | 17947   | 13504   | 2379    | 2668    | 26222   | 22373   | 9184    | 15297   | 5676    | 3596    |
| 3195    | 5111    | 3780    | 2737    | 2895    | 16178   | 12458   | 3130    | 3402    | 24720   | 24137   | 8885    | 14355   | 5682    | 3630    |
| 2752    | 4608    | 3994    | 2538    | 2240    | 18035   | 12888   | 2507    | 3343    | 25449   | 25649   | 7378    | 13407   | 5614    | 3844    |
| 9937    | 1001    | 8502    | 3417    | 8513    | 14445   | 9394    | 12142   | 6026    | 36798   | 12569   | 22570   | 12907   | 8691    | 3558    |
| 8178    | 818     | 8037    | 4554    | 6921    | 13698   | 8666    | 10457   | 6277    | 43671   | 15271   | 23841   | 12211   | 9404    | 3951    |
| 11365   | 1195    | 8553    | 5802    | 10157   | 19336   | 8228    | 15130   | 7310    | 42235   | 15102   | 30659   | 11745   | 11293   | 4493    |
| 8019    | 1327    | 6183    | 3960    | 7265    | 17979   | 14080   | 10567   | 5797    | 32193   | 15825   | 23014   | 19115   | 8125    | 3494    |
| 29984   | 1065    | 17129   | 1935    | 20193   | 6008    | 4846    | 25477   | 9908    | 60089   | 10927   | 12081   | 6266    | 8546    | 3941    |
| 24626   | 1202    | 14347   | 2048    | 15282   | 9021    | 6374    | 19210   | 8337    | 54393   | 11546   | 10994   | 8046    | 7579    | 3787    |
| 24011   | 947     | 10211   | 2291    | 17393   | 5544    | 4143    | 23724   | 7618    | 34862   | 9503    | 10002   | 5284    | 7023    | 3436    |
| 15088   | 592     | 7556    | 3012    | 12874   | 6790    | 3013    | 16846   | 7397    | 25979   | 7002    | 13662   | 4642    | 5133    | 2219    |
| 14326   | 714     | 7771    | 4566    | 14308   | 10148   | 4681    | 18695   | 8959    | 31724   | 10481   | 22699   | 7379    | 7681    | 3161    |
| 25176   | 988     | 10038   | 5250    | 22602   | 5540    | 3386    | 28465   | 11422   | 24486   | 7426    | 14622   | 4739    | 6866    | 3106    |
| 20481   | 1763    | 10883   | 2710    | 16243   | 7110    | 7385    | 19241   | 8855    | 33578   | 9883    | 17575   | 10255   | 6213    | 3286    |
| 35865   | 1213    | 16176   | 3836    | 26060   | 8830    | 5181    | 30643   | 12374   | 47647   | 11006   | 11364   | 6567    | 8098    | 4013    |
| 26041   | 606     | 9988    | 2108    | 21439   | 5381    | 3382    | 24361   | 7464    | 34462   | 8619    | 11956   | 4411    | 8384    | 3167    |
| 28682   | 1183    | 12681   | 2186    | 21327   | 5145    | 4968    | 24625   | 9199    | 41479   | 8908    | 10534   | 6193    | 7452    | 3124    |
| 48402   | 785     | 24121   | 1270    | 30263   | 3919    | 3453    | 34727   | 12963   | 68568   | 8236    | 6426    | 4246    | 7071    | 3684    |
| 33842   | 571     | 17468   | 1184    | 20674   | 3034    | 2994    | 21725   | 8908    | 60677   | 8173    | 6086    | 4133    | 7143    | 3110    |
| 41194   | 857     | 17562   | 2415    | 32130   | 3777    | 3400    | 38667   | 12106   | 52532   | 11225   | 12537   | 4475    | 10099   | 4757    |
| 35222   | 988     | 16150   | 1732    | 24184   | 5928    | 5416    | 28637   | 10762   | 55050   | 10640   | 9762    | 7235    | 6785    | 3371    |
| 32032   | 868     | 17060   | 2011    | 20039   | 3550    | 4727    | 26607   | 9979    | 58509   | 7736    | 14257   | 5793    | 7297    | 3878    |
| 26445   | 851     | 17185   | 2369    | 17777   | 3807    | 5315    | 21522   | 8809    | 78367   | 11111   | 13497   | 6095    | 13233   | 6226    |
| 19385   | 621     | 11561   | 2873    | 16196   | 2281    | 3613    | 24089   | 7911    | 51045   | 10780   | 21068   | 4486    | 13534   | 5721    |
| 24836   | 1135    | 16369   | 2526    | 18554   | 4086    | 8526    | 24402   | 9087    | 64015   | 11431   | 15591   | 10218   | 10561   | 5198    |

Data related to Figure 3d.

| Delivery to liver. |        |         |         |         |         |         |         |         |         |         |         |         |         |         |         |
|--------------------|--------|---------|---------|---------|---------|---------|---------|---------|---------|---------|---------|---------|---------|---------|---------|
| PEG Tail           | 14     | 14      | 18      | 18      | 16      | 16      | 16      | 16      | 18      | 16      | 18      | 14      | 14      | 14      | 14      |
| PEG MW             | 3000   | 3000    | 1000    | 3000    | 1000    | 2000    | 2000    | 2000    | 1000    | 1000    | 2000    | 1000    | 2000    | 2000    | 2000    |
| PEG Mol Wt         | 2.25   | 1.5     | 0.75    | 0.75    | 3       | 1.5     | 0.75    | 3.75    | 3       | 2.25    | 3.75    | 4.5     | 0.75    | 4.5     | 3       |
| Time (hrs)         | Nano_9 | Nano_10 | Nano_11 | Nano_12 | Nano_13 | Nano_14 | Nano_15 | Nano_16 | Nano_17 | Nano_18 | Nano_19 | Nano_20 | Nano_21 | Nano_22 | Nano_23 |
| 0.25               | 78140  | 130654  | 72794   | 66792   | 65999   | 65711   | 90318   | 53889   | 79677   | 73303   | 47214   | 143052  | 159654  | 48425   | 77458   |
| 0.25               | 40574  | 71045   | 61051   | 57450   | 61478   | 61614   | 78515   | 55484   | 72271   | 68554   | 42438   | 79837   | 93256   | 22558   | 31989   |
| 0.25               | 134884 | 219165  | 156891  | 113466  | 107886  | 117126  | 151238  | 83010   | 135090  | 135573  | 74556   | 254509  | 278227  | 82209   | 119689  |
| 0.25               | 51099  | 86778   | 68703   | 44057   | 43955   | 40472   | 62263   | 34823   | 55613   | 54754   | 29451   | 93099   | 100613  | 30450   | 47419   |
| 1                  | 5820   | 12739   | 52840   | 45356   | 50229   | 51163   | 59748   | 33126   | 56923   | 55458   | 42602   | 16530   | 21681   | 3264    | 3239    |
| 1                  | 9682   | 19506   | 103795  | 82867   | 96056   | 108873  | 110924  | 65918   | 106855  | 106378  | 69078   | 28628   | 31929   | 5772    | 6004    |
| 1                  | 10150  | 19986   | 158930  | 99281   | 94057   | 105548  | 146417  | 61094   | 124850  | 128049  | 72608   | 28638   | 32744   | 5908    | 5741    |
| 1                  | 10543  | 19927   | 80208   | 53142   | 57787   | 63960   | 72271   | 46015   | 68047   | 62674   | 50308   | 26257   | 25054   | 7029    | 10795   |
| 2                  | 3622   | 8176    | 98389   | 73466   | 33423   | 39069   | 92276   | 7355    | 103018  | 69409   | 71922   | 10967   | 16971   | 2109    | 2114    |
| 2                  | 6756   | 13856   | 226508  | 133300  | 65052   | 85878   | 181225  | 13400   | 183867  | 142454  | 116060  | 21568   | 29833   | 4009    | 3781    |
| 4                  | 7517   | 20966   | 248948  | 131270  | 46361   | 50075   | 159336  | 8349    | 181112  | 105921  | 106387  | 26696   | 45725   | 3480    | 3637    |
| 4                  | 10730  | 28744   | 337592  | 196243  | 63501   | 72364   | 228341  | 12238   | 252102  | 154947  | 130281  | 34175   | 62422   | 5508    | 6064    |
| 4                  | 4798   | 10101   | 237920  | 159932  | 41633   | 55174   | 175509  | 8453    | 221014  | 123051  | 149118  | 14834   | 25374   | 2263    | 2230    |
| 4                  | 4370   | 10766   | 183211  | 82221   | 28413   | 29940   | 96269   | 4350    | 120710  | 63930   | 69630   | 14091   | 24841   | 2009    | 2508    |
| 8                  | 2512   | 7477    | 106427  | 48261   | 13247   | 15225   | 59403   | 1900    | 65305   | 30979   | 39246   | 8872    | 18725   | 1015    | 1349    |
| 8                  | 505    | 1167    | 23923   | 7950    | 2385    | 2504    | 9823    | 360     | 10263   | 5144    | 3537    | 1611    | 3078    | 203     | 246     |
| 24                 | 1055   | 2583    | 41968   | 8406    | 3881    | 4115    | 12981   | 315     | 10572   | 8819    | 1243    | 3909    | 8083    | 253     | 359     |
| 24                 | 636    | 1594    | 38292   | 6318    | 2640    | 2645    | 8634    | 196     | 6538    | 5131    | 698     | 3143    | 3979    | 162     | 291     |

|         |         |         |         |         |         |         |         |         |         |         |         |         |         |         |
|---------|---------|---------|---------|---------|---------|---------|---------|---------|---------|---------|---------|---------|---------|---------|
| 18      | 14      | 18      | 16      | 18      | 14      | 14      | 18      | 18      | 18      | 16      | 16      | 14      | 16      | 16      |
| 3000    | 3000    | 2000    | 3000    | 3000    | 1000    | 1000    | 2000    | 3000    | 1000    | 3000    | 1000    | 1000    | 2000    | 3000    |
| 4.5     | 3       | 2.25    | 3       | 3.75    | 1.5     | 3.75    | 4.5     | 2.25    | 1.5     | 0.75    | 4.5     | 3.75    | 2.25    | 1.5     |
| Nano_24 | Nano_25 | Nano_26 | Nano_27 | Nano_28 | Nano_29 | Nano_30 | Nano_31 | Nano_32 | Nano_33 | Nano_34 | Nano_35 | Nano_36 | Nano_37 | Nano_38 |
| 48029   | 59261   | 69211   | 50832   | 29264   | 240405  | 131598  | 33360   | 46058   | 61466   | 56697   | 59359   | 110817  | 53059   | 40555   |
| 44196   | 22950   | 65738   | 48792   | 26064   | 207055  | 71696   | 30243   | 44331   | 53607   | 46884   | 55740   | 57967   | 53674   | 37485   |
| 66872   | 81057   | 104103  | 75218   | 45099   | 388283  | 237633  | 56750   | 69376   | 129635  | 87836   | 91860   | 179186  | 88846   | 67259   |
| 27860   | 37788   | 40678   | 32239   | 17700   | 140787  | 83924   | 20048   | 28435   | 52162   | 37417   | 39627   | 73997   | 32881   | 26037   |
| 49874   | 1801    | 69065   | 25687   | 26647   | 59522   | 14600   | 30090   | 46596   | 42624   | 40830   | 40296   | 10659   | 33785   | 27645   |
| 79603   | 2893    | 113419  | 52365   | 46110   | 88088   | 23216   | 51950   | 79055   | 84462   | 70767   | 73927   | 15641   | 71093   | 53569   |
| 76716   | 2731    | 127158  | 47545   | 47054   | 95269   | 25520   | 54700   | 80216   | 122575  | 72610   | 72297   | 16854   | 65446   | 49556   |
| 62440   | 5991    | 77596   | 40066   | 33498   | 57652   | 21415   | 36696   | 51646   | 57004   | 46087   | 50579   | 17032   | 45941   | 35706   |
| 64884   | 1208    | 107094  | 4136    | 38774   | 47359   | 10500   | 50481   | 55699   | 77556   | 38056   | 18308   | 7068    | 9511    | 13197   |
| 99479   | 1689    | 181129  | 7521    | 63302   | 83019   | 20588   | 86219   | 88371   | 176582  | 66642   | 35695   | 11983   | 18605   | 23113   |
| 82450   | 2304    | 134594  | 4136    | 53001   | 107143  | 26010   | 69760   | 65183   | 174738  | 64643   | 25419   | 19059   | 12108   | 19672   |
| 94245   | 4126    | 141691  | 6190    | 72631   | 133439  | 34509   | 83221   | 72281   | 249299  | 90637   | 34169   | 24838   | 17534   | 28461   |
| 110540  | 1207    | 217452  | 3794    | 65900   | 77413   | 14461   | 110956  | 100189  | 190557  | 52620   | 19171   | 9080    | 12005   | 19166   |
| 47426   | 1450    | 72939   | 2098    | 35354   | 70390   | 12437   | 39227   | 34568   | 120717  | 37034   | 14820   | 9306    | 6390    | 10870   |
| 22978   | 731     | 31746   | 950     | 20702   | 58903   | 8350    | 22056   | 16291   | 71080   | 21743   | 7053    | 6000    | 2908    | 5429    |
| 1832    | 132     | 3309    | 173     | 1940    | 8382    | 1539    | 2008    | 1758    | 14933   | 3698    | 1131    | 1183    | 501     | 957     |
| 820     | 208     | 1501    | 178     | 1862    | 26480   | 3484    | 542     | 969     | 22742   | 5349    | 1683    | 2747    | 628     | 1099    |
| 523     | 130     | 669     | 141     | 1360    | 15562   | 2733    | 346     | 514     | 16038   | 2993    | 1023    | 2491    | 302     | 738     |
